# Supplementary material
Source: publisher figshare collection journal article supplement (https://sage.figshare.com/ndownloader/files/16347482)
Supplement: Supplementary file 1 [file 16347482]

# On the Bias of Precision Estimation under Separate Sampling - Supplementary Material

Shuilian Xie and Ulisses Braga-Neto

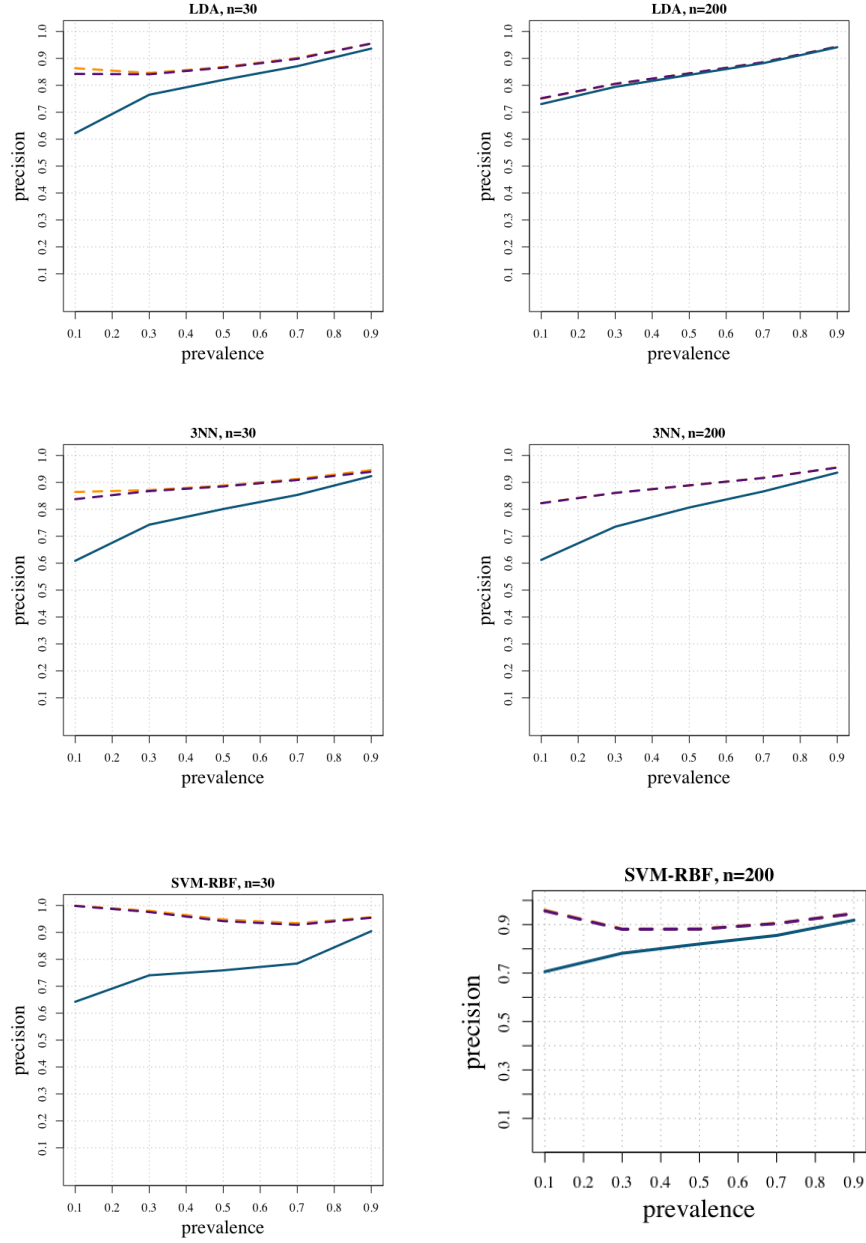

Figure 1: Precision under mixture sampling, as a function of prev for different classification rules and different sample size using synthetic data. Average true precision values (solid blue curve) and average precision estimates  $\widehat{\text{prec}}$  (dashed orange curve) and  $\widehat{\text{prec}}^{\text{new}}$  (dashed purple curve)

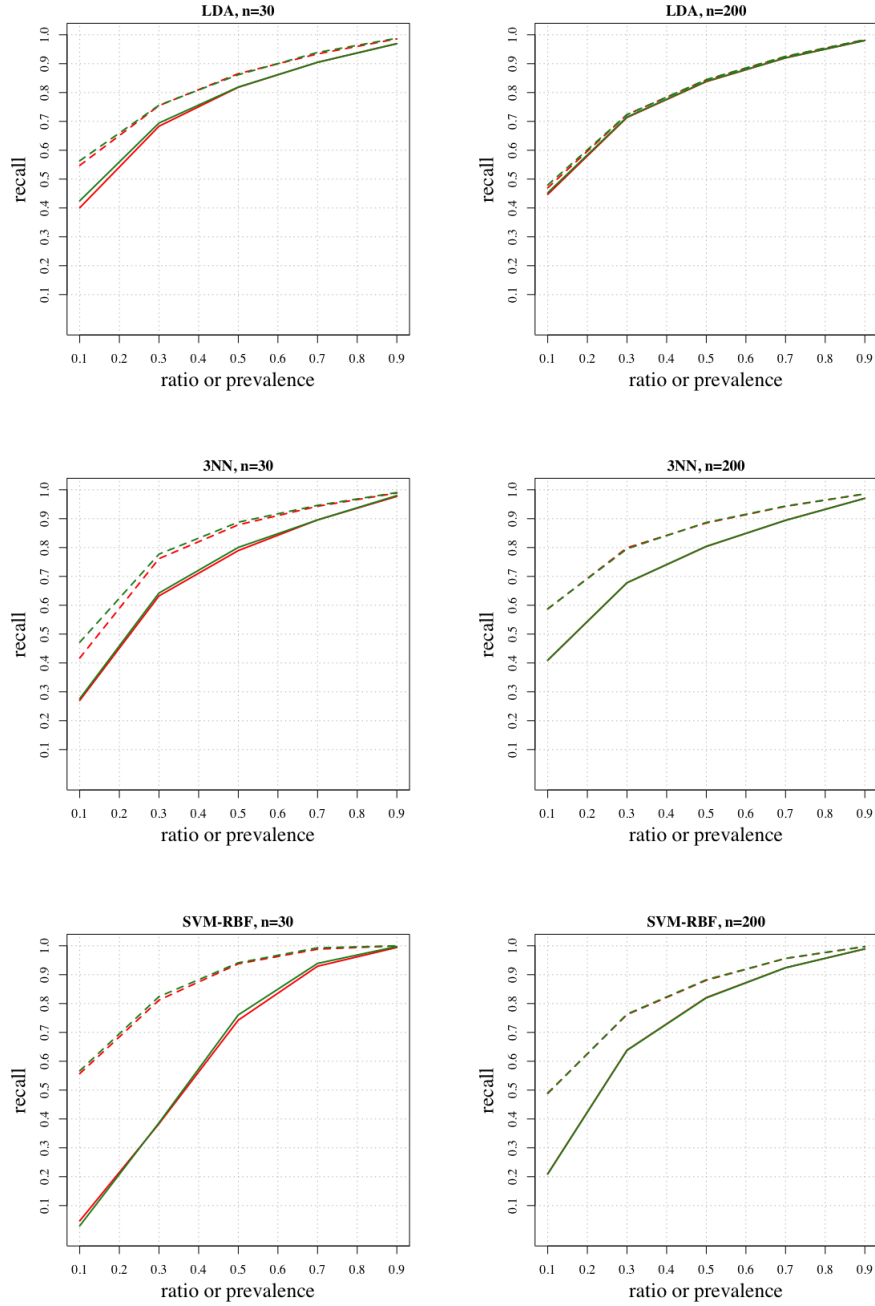

Figure 2: Recall under mixture and separate sampling, as a function of  $r$  or prev for different classification rules and different sample size using synthetic data. Average true recall values (solid curves) and average recall estimates (dashed curves). Mixture sampling (red) and separate sampling (green).
